# Supplementary material for: Collagen Type XI Alpha 1 Expression in Intraductal Papillomas Predicts Malignant Recurrence
Source: Hindawi journal article supplement (doi:10.1155/2015/812027), 2015-01-01
Supplement: f1 [file 812027.f1.pdf]

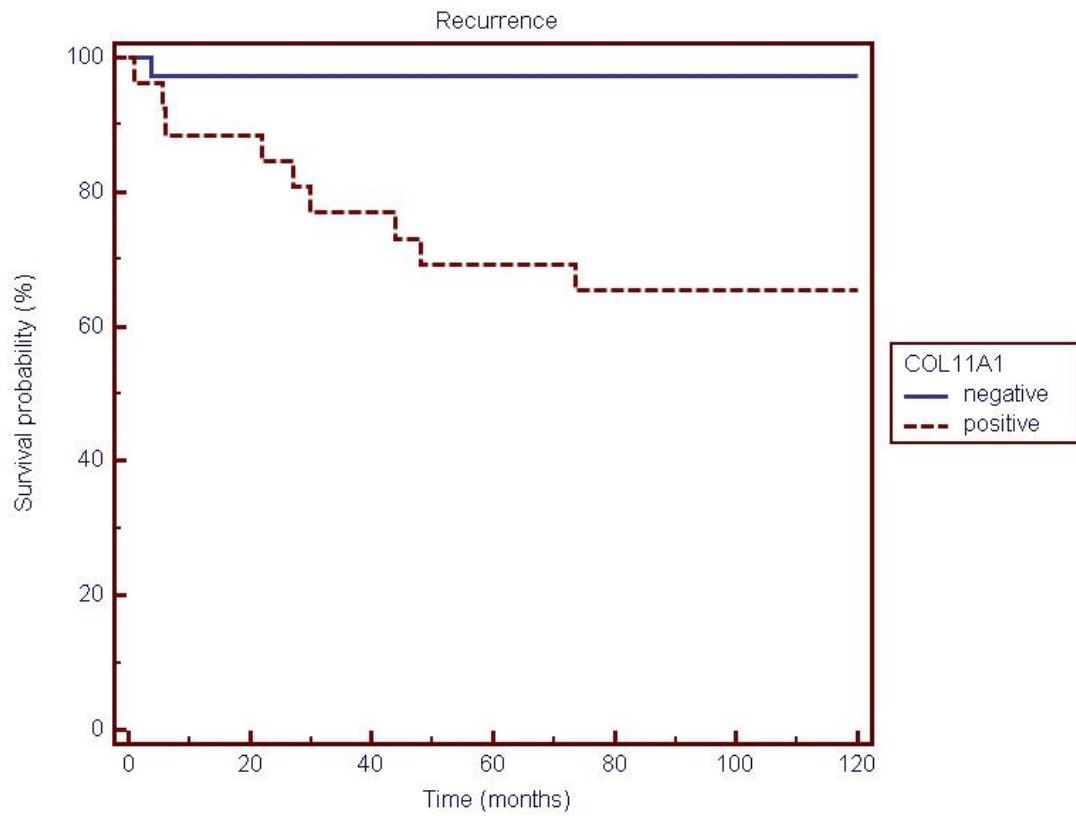

SD Figure 1. Kaplan-Meier recurrence free analysis across categories of COL11A1.
